# Supplementary material
Source: HighWire-hosted journal article supplement (https://bibliotheek.ehb.be/content/6/1/e000478)

**Supplementary Table 1: Versions of the questions**

The following questions are included in the BLF COPD PP. Options for responses are ‘Yes’, ‘No’ and ‘Not sure’. Question 5 has an additional option of ‘I don’t smoke’.

| V1 (from 1/11/2014)                                                                                                                                  | V2 (after 1/12/2016)                                                                                                                                           | Change                                                                   |
|------------------------------------------------------------------------------------------------------------------------------------------------------|----------------------------------------------------------------------------------------------------------------------------------------------------------------|--------------------------------------------------------------------------|
| 1. My diagnosis of COPD was confirmed with a lung function test (spirometry).                                                                        | 1. My diagnosis of COPD was confirmed with a breathing test called spirometry.                                                                                 | minor                                                                    |
| 2. I understand my COPD and my health care professional has explained where to find information, advice and emotional support.                       | 2. I understand my COPD. My doctor or nurse has explained where to find information, advice and emotional support (if I need it).                              | minor                                                                    |
| 3. I am supported to manage my care, and have agreed and been given a copy of my self-management plan                                                | 3. I get support to manage my care, and have agreed a written plan with my doctor or nurse about how I will manage my COPD                                     | minor                                                                    |
| 4. I have contacted my GP to get a free flu vaccination by November each year. I have also had the one-off pneumonia jab.                            | 4. I contact my GP, nurse or pharmacist to get a free flu vaccination each year. I have also had the one-off pneumonia jab                                     | minor                                                                    |
| 5. If I smoke, I am offered support and treatment to stop every time I meet with a health care professional.                                         | 5. If I smoke, I am offered support and treatment to stop every time I meet my doctor or nurse about my COPD.                                                  | minor                                                                    |
| 6. I know the importance of keeping active and eating well.                                                                                          | 6. I know the importance of keeping active and eating well.                                                                                                    | nil                                                                      |
| 7. I have had a referral to pulmonary rehabilitation.                                                                                                | 7. I have discussed pulmonary rehabilitation                                                                                                                   | “Referred” changed to discussed                                          |
| 8. I have received advice about ongoing exercise and nutrition.                                                                                      | 8. I have received advice about ongoing exercise and nutrition                                                                                                 | nil                                                                      |
| 9. I know what all my medicines are for and when to take them.                                                                                       | 9. I know what all my medicines and inhalers are for and when to take them. I ask my doctor, nurse or pharmacist if I’m not sure.                              | Minor. Added “ask for help if I’m not sure”                              |
| 10. My health care professional reviews how I use my inhaler every time I meet them.                                                                 | 10. My doctor or nurse reviews how I use my inhaler at least once a year. I ask my pharmacist if I have questions                                              | Changed from every visit to once a year and added reference to pharmacy. |
| 11. I can spot the signs of a flare-up - this is sometimes called an exacerbation.                                                                   | 11. I can spot the signs of a flare-up. This is sometimes called an exacerbation and can be the start of a chest infection.                                    | minor                                                                    |
| 12. If I have a flare-up, I know who to contact and what medicines to take.                                                                          | 12. If I have a flare-up, I know who to contact at any time and what medicines to take. I have these medicines at home.                                        | Added having medication at home.                                         |
| 13. I see my doctor or nurse at least once a year to review my health, my care and my treatment, and to discuss all the points mentioned previously. | 13. I see my doctor or nurse at least once a year to review my health, my care and my treatment, and have time to discuss all the points mentioned previously. | Added “having time”                                                      |

The text of some of the questions was amended at the end of 2016. This was intended for clarity and also to serve in some cases to encourage people completing the passport to seek out missing care items that had not been delivered.

This may explain the apparent uptick in inhaler technique review in 2016 as the criteria changed from every visit to once a year and support from pharmacists was specifically mentioned.

Graph 1: Q1: My diagnosis of COPD was confirmed with a breathing test called spirometry.

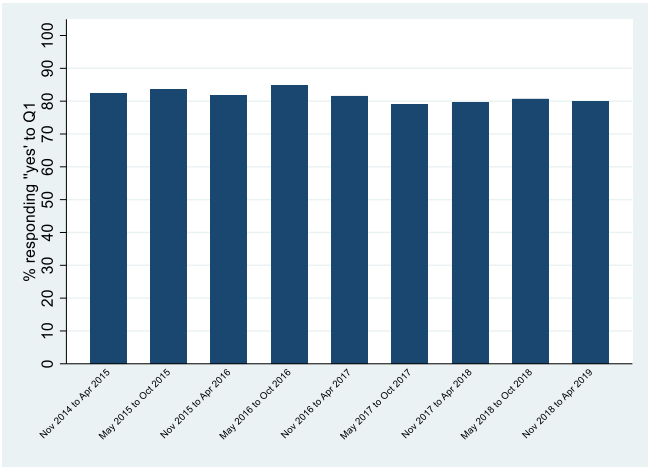

Graph 2: Q2: I understand my COPD. My doctor or nurse has explained where to find information, advice and emotional support

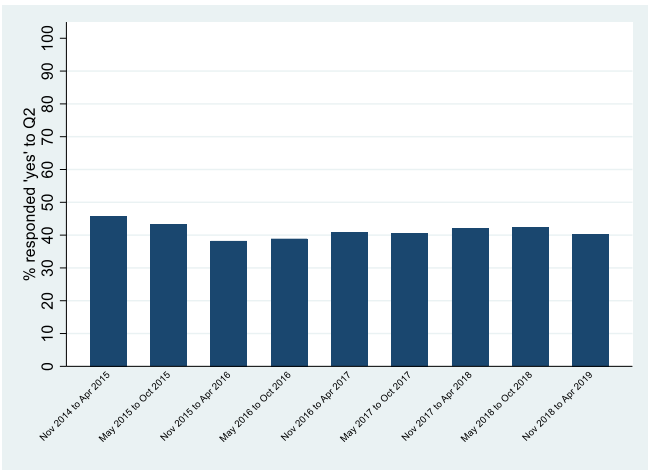

Graph 3: Q3: I get support to manage my care, and have agreed a written plan with my doctor or nurse about how I will manage my COPD

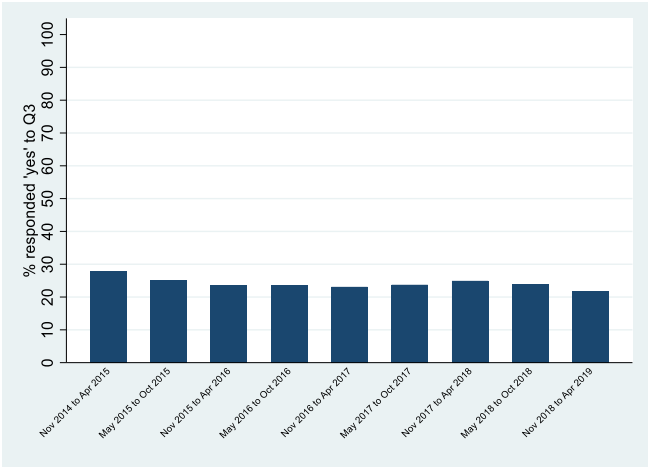

Graph 4: Q4: I contact my GP, nurse or pharmacist to get a free flu vaccination each year. I have also had the one-off pneumonia jab

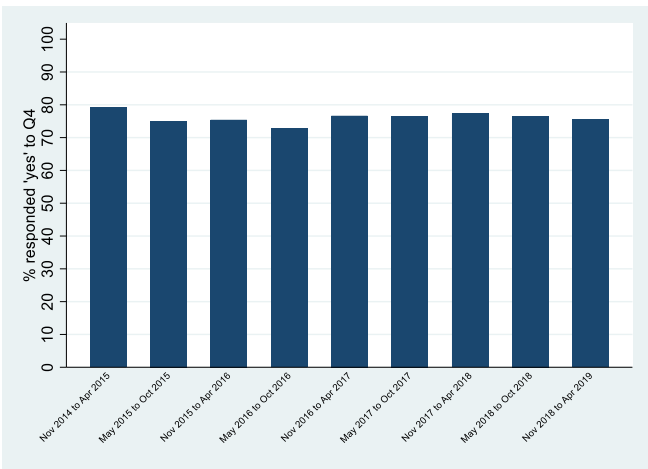

Graph 5: Q5: If I smoke, I am offered support and treatment to stop every time I meet my doctor or nurse about my COPD (n= 14,395 after removal of non-smokers)

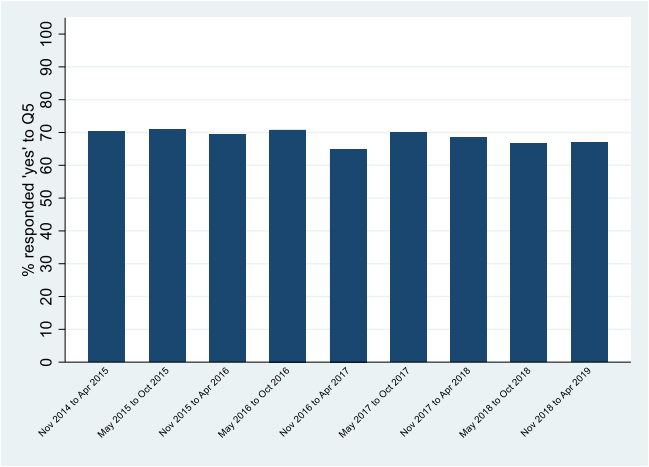

Graph 6: Q6: I know the importance of keeping active and eating well

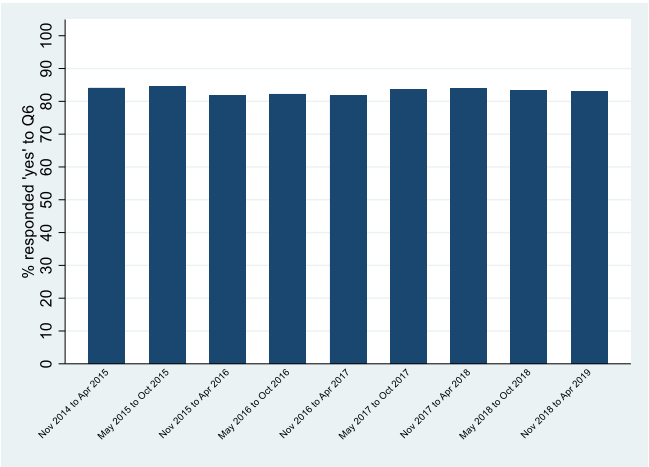

Graph 7: Q7: I have discussed pulmonary rehabilitation

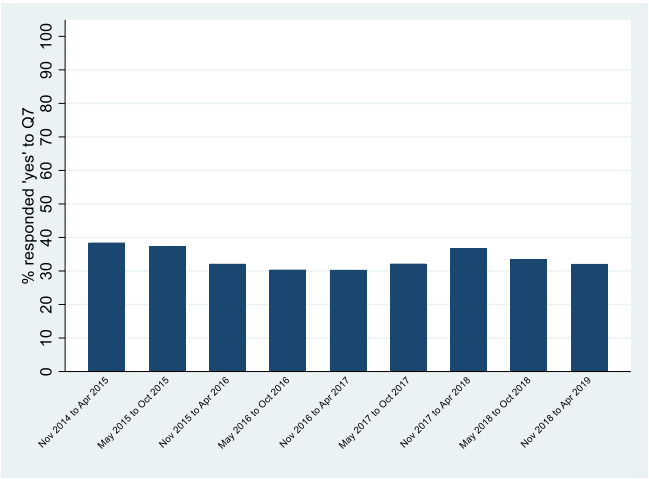

Graph 8: Q8: I have received advice about ongoing exercise and nutrition

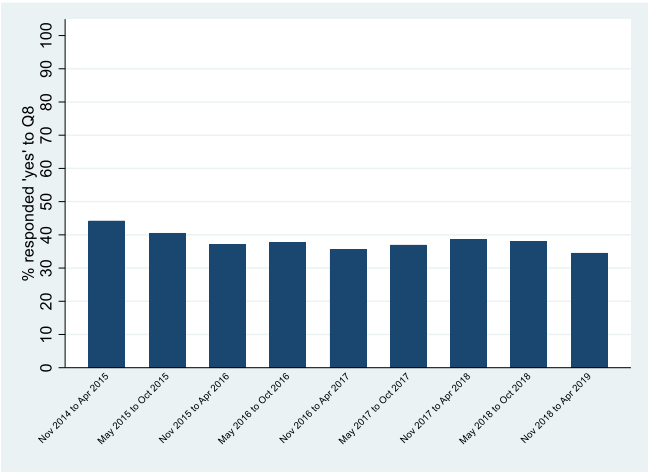

Graph 9: Q9: I know what all my medicines and inhalers are for and when to take them. I ask my doctor, nurse or pharmacist if I’m not sure.

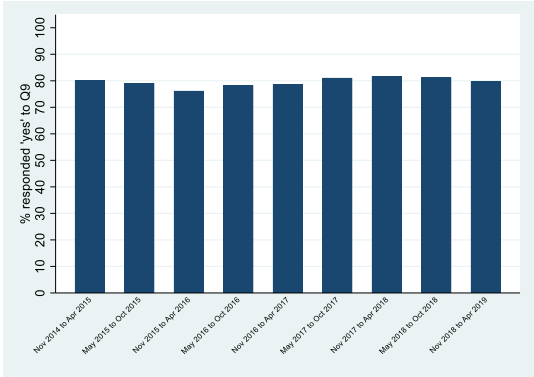

Graph 10: Q10: My health care professional reviews how I use my inhaler at least once a year. I ask my pharmacist if I have questions

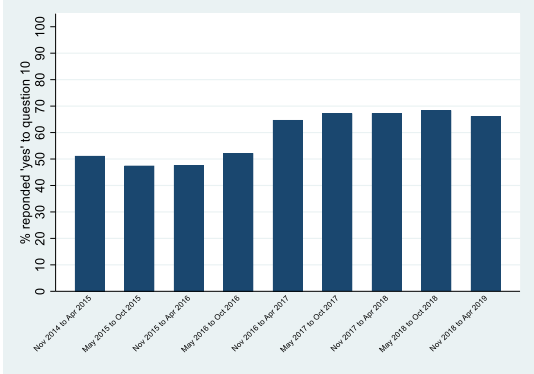

(nb change to question from “every visit” to “annual” at the end of 2016)

Graph 11: Q11: I can spot the signs of a flare-up. This is sometimes called an exacerbation and can be the start of a chest infection

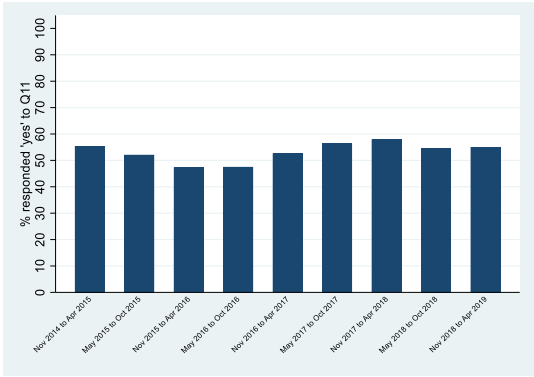

Graph 12: Q12: If I have a flare-up, I know who to contact at any time and what medicines to take. I have these medicines at home

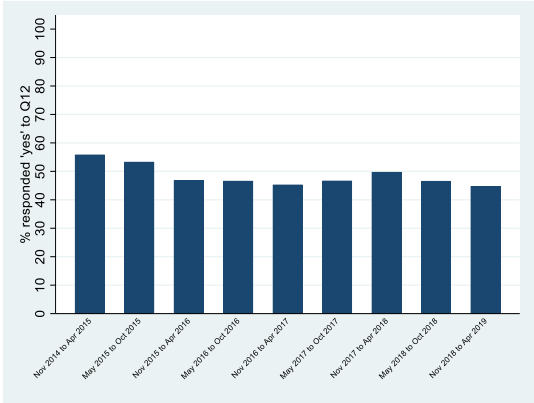

Graph 13: Q13: I see my nurse or doctor at least once a year to review my health, my care and my treatment, and have time to discuss all the points mentioned previously

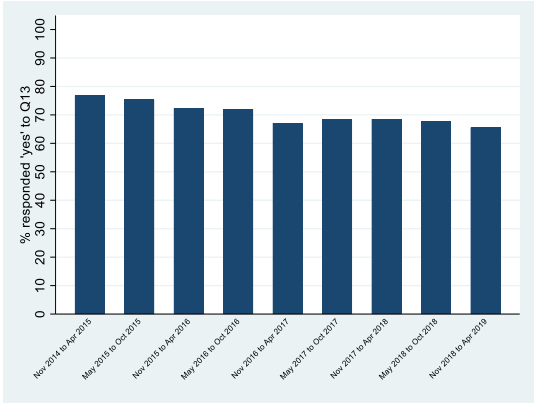

Supplement: inline-supplementary-material-1 [file inline-supplementary-material-1.pdf]
